# Supplementary material
Source: publisher figshare collection journal article supplement (https://acs.figshare.com/ndownloader/files/4174507)
Supplement: Supplementary file 1 [file 4174507]

## Supporting Information Available

### An NMR Study of Preferential Endohedral Adsorption of Methanol in Multi-walled carbon nanotubes

Xin Liu, Xiulian Pan, Wanling Shen, Pengju Ren, Xiuwen Han, Xinhe Bao\*

State Key Laboratory of Catalysis, Dalian Institute of Chemical Physics, Chinese Academy of  
Sciences, 457 Zhongshan Road, Dalian 116023, P. R. China

#### SI-1. TEM image of O-CNTs

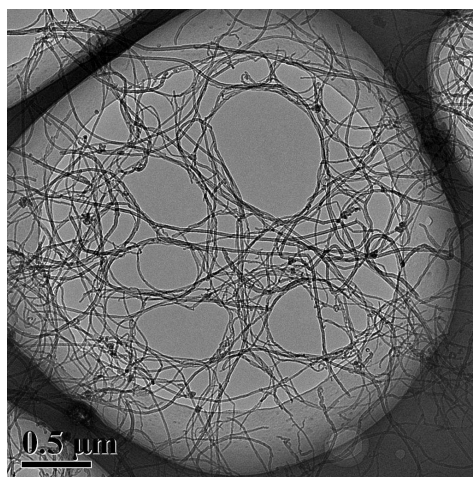

**Figure SI.** TEM image of O-CNTs after concentrated HNO<sub>3</sub> treatment.

#### SI-2. ESR spectra of O-CNTs for NMR analysis

EPR measurement was performed at 100 K using a Bruker EMX spectrometer operating at a microwave frequency of 9.813 GHz and a power of 30 mW. As shown in Figure S2, EPR signal for superparamagnetic catalyst particles is absent, indicating that there is almost no residual catalyst in our NMR sample.

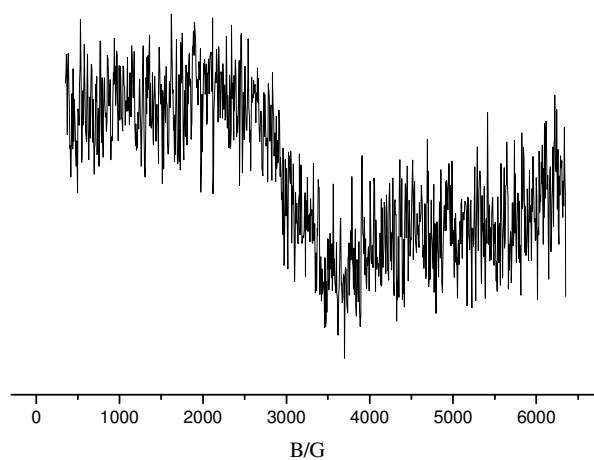

**Figure S2.** ESR spectrum of O-CNTs after annealing at 1173 K under Ar atmosphere.

**SI-3. Computational model for methanol inside and outside (6,6) and (11,0) nanotubes.**

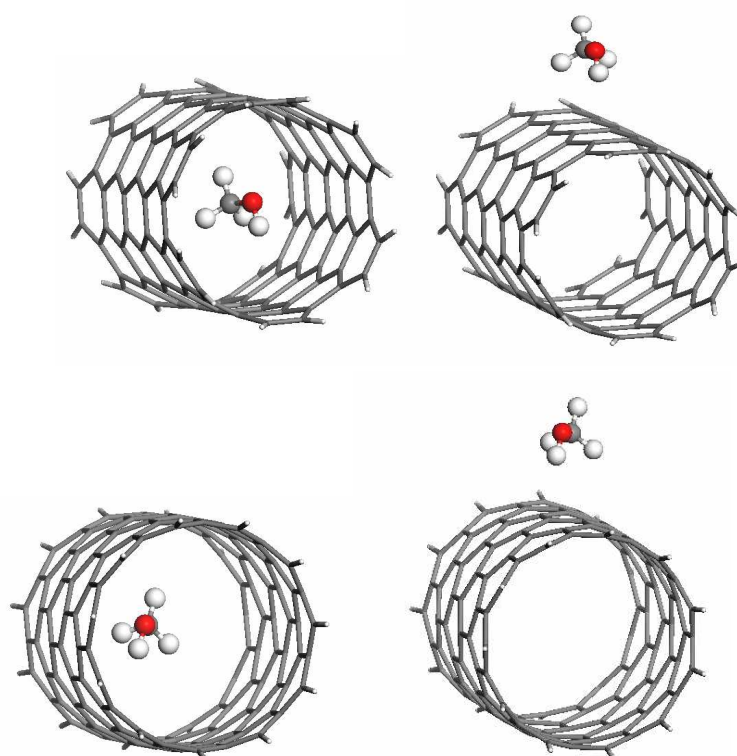

**Figure S3.** Upper panels and lower panels are optimized structures for methanol inside and outside

(6,6) and (11,0) nanotubes respectively.
